# Supplementary material for: Long-Term Effects of Ionizing Radiation on the Hippocampus: Linking Effects of the Sonic Hedgehog Pathway Activation with Radiation Response
Source: MDPI journal article supplement (doi:10.3390/ijms222212605), 2021-11-22
Supplement: s1 [file s1]

# Supplementary material

## Long-term effects of ionizing radiation on the hippocampus: linking the effect of Sonic Hedgehog pathway activation with radiation response

Francesca Antonelli <sup>1\*</sup>, Arianna Casciati<sup>1</sup>, Montserrat Belles<sup>2</sup>, Noemi Serra<sup>2</sup>, Maria V. Linares-Vidal<sup>2</sup>, Carmela Marino<sup>1</sup>, Mariateresa Mancuso<sup>1</sup>, Simonetta Pazzaglia<sup>1\*</sup>

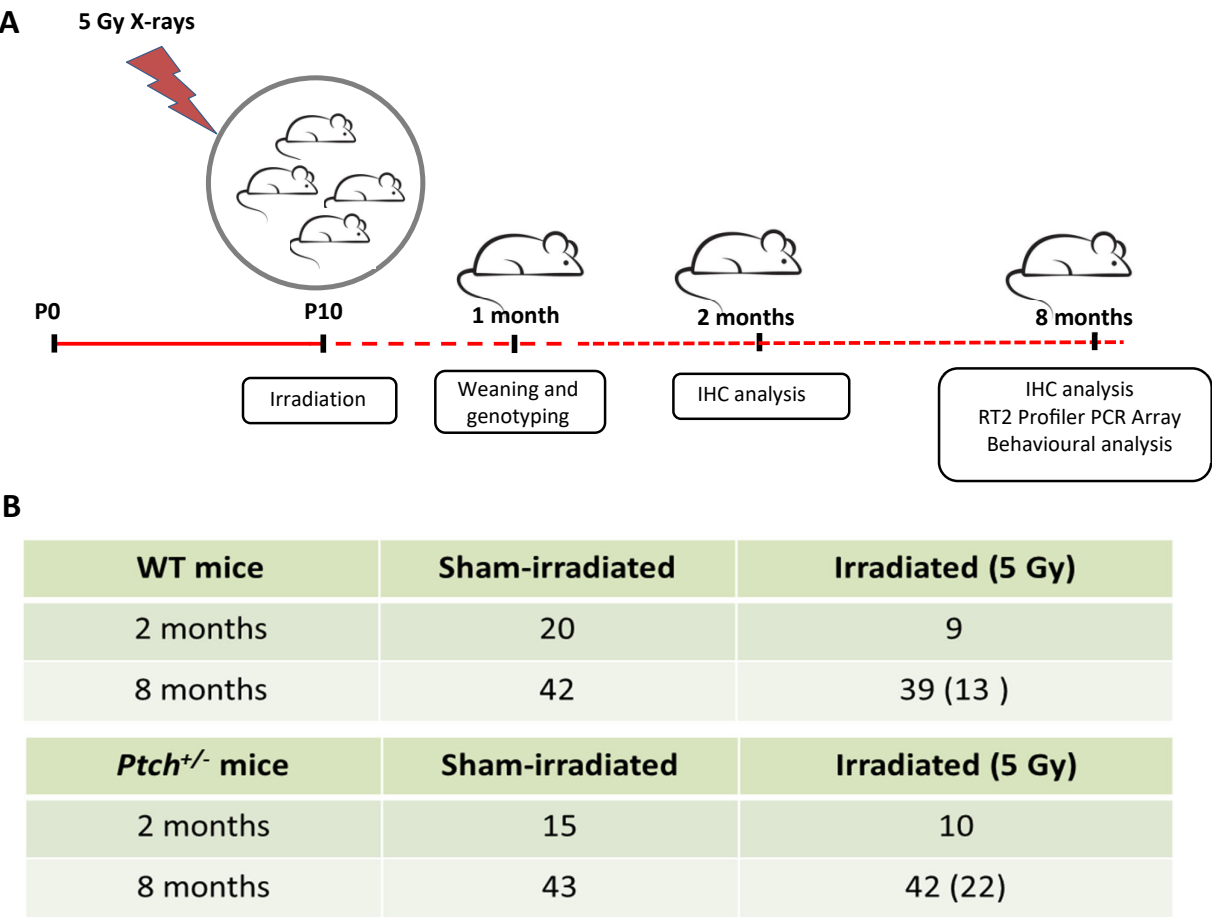

**Figure S1.** (A) Experimental scheme, indicating the time of irradiation and genotyping, as well as the time-points of the different analyses. Irradiation with 5 Gy produced less than 12% of mortality before weaning, when the mouse genotype was still unknown. (B) The table reports the total number of sham- or X-ray-irradiated (5 Gy) mice. In brackets are the number of mice death after weaning, indicating a mortality of 33% for WT mice and 52% for *Ptch*<sup>+/-</sup> mice up to 8 months of age.

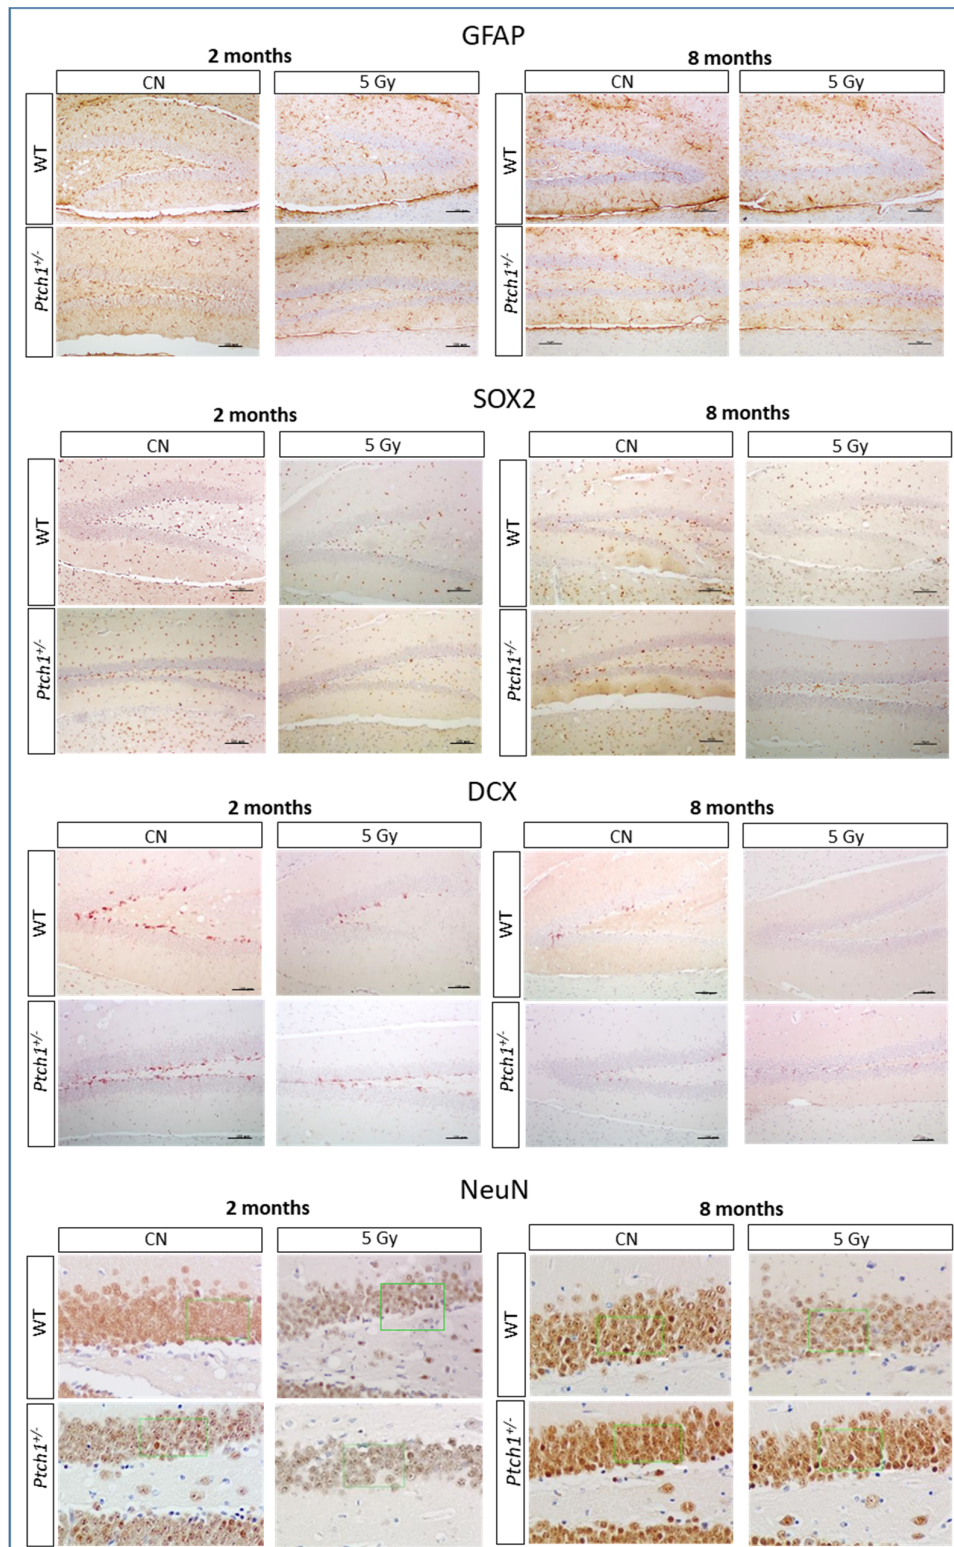

**Figure S2.** Representative immunostained images for each stage specific neural marker. A) Glial Fibrillary Acidic Protein (GFAP); B) Sex determining region Y (SRY) box 2 (SOX2); (C) doublecortin (DCX) and (D) mature neurons (NeuN). Images, 10X (GFAP, SOX2 and DCX) and 20X (NeuN) magnification, scale bar in the figures. The green rectangular field of 2000  $\mu\text{m}^2$  in D delineates a representative area in which NeuN analysis was carried out.

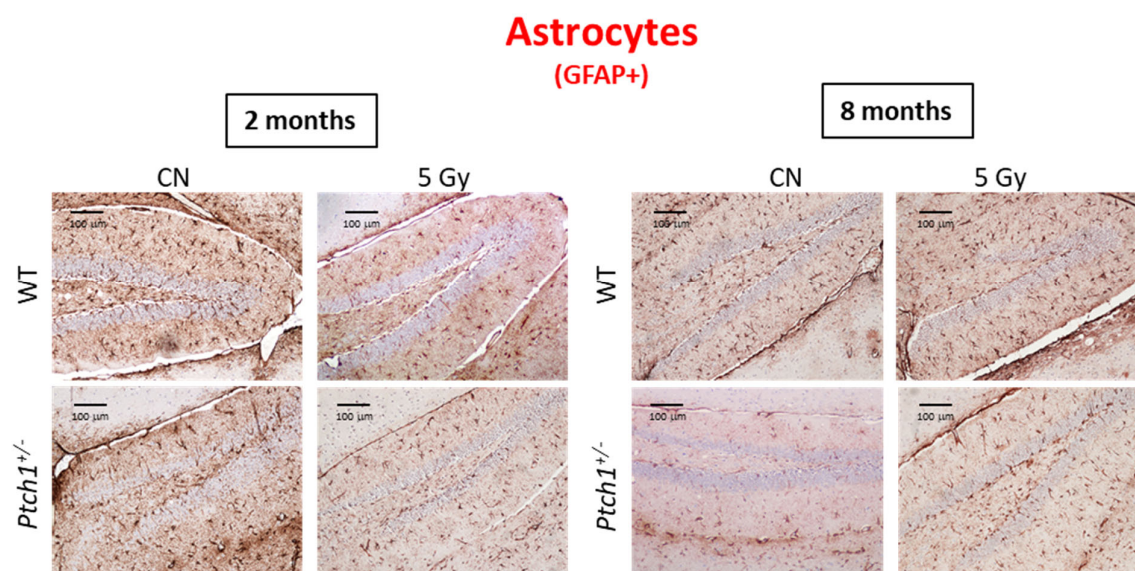

**Figure S3.** Representative immunostained images for GFAP+ astrocytes. Images, 10X magnification, scale bar in the figures.
